# Supplementary material for: The size of the proton
Source: Springer Nature journal article supplement (doi:10.1038/nature09250), 2010-07-01
Supplement: nature09250-s1.pdf [file nature09250-s1.pdf]

## 2S–2P splitting in muonic hydrogen

### Supplementary information for Nature

PACS: 31.30.jf, 36.10.Ee, 31.30.Gs

The relation between the transition energy that we measured and the proton root mean square charge radius  $r_p$  requires detailed calculation of relativistic, QED and recoil corrections to the energies of the 2S and 2P levels, some of which are charge-radius dependent. As the proton has a magnetic moment, the hyperfine structure correction for each level has to be taken into account, as well as QED corrections to the hyperfine structure.

The main calculations directly applicable to muonic hydrogen can be found in the works of Pachucki<sup>1–3</sup> and Borie<sup>4,5</sup>. Detailed description of existing terms can be found in the review and book of Eides, Grotch and Shelyuto<sup>6,7</sup>. The fine structure splitting between the  $2P_{1/2}$  and  $2P_{3/2}$  levels is given in Refs.<sup>5,8</sup>. Some hyperfine corrections can be found in the same references, but more precise calculations have been performed for the 2S and 2P states by Martynenko<sup>8,9</sup>.

Here we describe how we arrive at the equation that was used to extract the proton charge radius from the measurement. The task is not so easy as different authors use different terminology for identical terms. Moreover the dependence on the proton radius is not always explicitly given for all terms.

The main uncertainties originate from the proton polarizability, and from different values of the Zemach radius. The Zemach radius describes the first order nuclear structure correction to the hyperfine splitting, given by the finite charge and magnetic moment distribution in the proton<sup>10</sup>.

We started from Table I in Ref.<sup>5</sup> as it provides the exact Dirac contribution for the main vacuum polarization contribution to the Lamb shift. All listed contributions were checked against the other references provided above whenever possible. Summing up the corrections given in the main table, we noticed that the equation provided in Ref.<sup>5</sup> does not exactly correspond to the values given in the table. Since these works were published, a mistake in Ref.<sup>11</sup> was found and corrected in<sup>12</sup>. We then added a few small extra terms provided in<sup>7</sup>. Terms that are obtained by

a formula depending only on fundamental constants have been recalculated with more significant digits. We also recalculated some of the radius-dependent part from the formulas provided in<sup>7</sup>, to have consistent numerical accuracy whenever possible.

The list of all contributions, and the final values are presented in Table 1 for the radius-independent part of the 2S – 2P Lamb shift, and in Table 2 for the radius-dependent part. Note that there is a term called “Nuclear size correction of order  $(Z\alpha)^6$ ” in Table 7.1 of Ref.<sup>7</sup>, and “Finite size of order  $\alpha^6$ ” in Table I of Ref.<sup>2</sup>, which is not included in Ref.<sup>5</sup>. In Ref.<sup>2</sup>, it is provided as a proton radius independent term  $-0.0009$  meV for  $r_p = 0.862$  fm, but it actually contains both a  $r_p^2$  and a  $r_p^4$  contribution to the 2S –  $2P_{1/2}$  splitting<sup>7</sup>. We include the  $r_p^2$  dependent part in Tab. 2, but we neglect the term  $0.000043 r_p^4 = 2.5 \cdot 10^{-5}$  meV, because it is irrelevant at our level of accuracy.

From these contributions we obtain the 2S –  $2P_{1/2}$  Lamb shift

$$\Delta E_{LS} = 206.0573(45) - 5.2262 r_p^2 + 0.0347 r_p^3 \text{ meV, (1)}$$

where  $r_p = \sqrt{\langle r_p^2 \rangle}$  is the root mean square charge radius of the proton in fm. The uncertainties in Table 1 have been added in quadrature to obtain the total uncertainty of 0.0045 meV. This value is dominated by the proton polarizability contribution of Borie<sup>5</sup> (#25 in Tab. 1), who took into account the scatter of the polarizability terms by several authors for her quoted uncertainty.

The 2S hyperfine structure depends on the Zemach radius  $R_Z$ . Here we follow Ref.<sup>9</sup>, who uses  $R_Z = 1.022$  fm [see Eq.(7) of Ref.<sup>13</sup>] and adopt

$$\Delta E_{HFS}^{2S} = 22.8148 (78) \text{ meV. (2)}$$

Of above’s total uncertainty of 0.0078 meV, 0.0060 meV are due to the scatter of various determinations of the Zemach radius.

The fine structure is given by<sup>8</sup>

$$\Delta E_{FS} = 8.352082 \text{ meV, (3)}$$

which compares well with Borie’s value 8.352 meV.

Finally the  $2P_{3/2}$  hyperfine structure is given by<sup>8</sup>

$$\Delta E_{HFS}^{2P_{3/2}} = 3.392588 \text{ meV.} \quad (4)$$

The  $2P_{3/2}^{F=2}$  level shift with respect to the unperturbed  $2P_{1/2}$  level is  $\Delta E_{FS} + \frac{3}{8}\Delta E_{HFS}^{2P_{3/2}} = 9.6243 \text{ meV}$ . For comparison, Borie's value is  $9.624 \text{ meV}$ .

The level energies are thus:

$$\begin{aligned} E_{2S_{1/2}^{F=1}} &= \frac{1}{4}\Delta E_{HFS}^{2S} = 5.7037 \text{ (20) meV,} \\ E_{2P_{3/2}^{F=2}} &= \Delta E_{LS} + \Delta E_{FS} + \frac{3}{8}\Delta E_{HFS}^{2P_{3/2}} \\ &= 215.6816 \text{ (45)} - 5.2262r_p^2 \\ &\quad + 0.0347r_p^3 \text{ meV.} \end{aligned} \quad (5)$$

This leads to the transition energy for the measured  $2S_{1/2}^{F=1} - 2P_{3/2}^{F=2}$  transition in muonic hydrogen:

$$\begin{aligned} E_{2P_{3/2}^{F=2}} - E_{2S_{1/2}^{F=1}} &= 209.9779 \text{ (49)} - 5.2262r_p^2 \\ &\quad + 0.0347r_p^3 \text{ meV,} \end{aligned} \quad (6)$$

where the uncertainty of the constant term is the quadratic sum of the uncertainty of the Lamb shift [Eq.(1)] and 1/4 of the 2S hyperfine structure [Eq.(2)]. Note that the  $r_p^3$  term is for a "dipole" model of the proton form factor<sup>5</sup>.

1. K. Pachucki, Phys. Rev. A **53**(4), 2092 (1996)
2. K. Pachucki, Phys. Rev. A **60**(5), 3593 (1999)
3. A. Veitia, K. Pachucki, Phys. Rev. A **69**(4), 042501 (2004)
4. E. Borie, Zeitschrift für Physik A Hadrons and Nuclei **278**(2), 127 (1976)
5. E. Borie, Phys. Rev. A **71**(3), 032508 (2005)
6. M.I. Eides, H. Grotch, V.A. Shelyuto, Physics Reports **342**(2-3), 63 (2001)
7. M.I. Eides, H. Grotch, V.A. Shelyuto, *Theory of light hydrogenic bound states*, Vol. 222 of *Springer tracts in modern physics* (Springer, Berlin Heidelberg, 2007)
8. A.P. Martynenko, Physics of Atomic Nuclei **71**(1), 125 (2008)
9. A.P. Martynenko, Phys. Rev. A **71**(2), 022506 (2005)
10. A.C. Zemach, Phys. Rev. **104**(6), 1771 (1956)
11. T. Kinoshita, M. Nio, Phys. Rev. Lett. **82**(16), 3240 (1999)
12. V.G. Ivanov, E.Y. Korzinin, S.G. Karshenboim, Phys. Rev. D **80**(2), 027702 (2009)
13. E.V. Cherednikova, R.N. Faustov, A.P. Martynenko, Nuclear Physics A **703**(1-2), 365 (2002)
14. A. Di Giacomo, Nuclear Physics B **11**(2), 411 (1969)
15. G.A. Rinker, Phys. Rev. A **14**(1), 18 (1976)
16. E. Borie, G.A. Rinker, Phys. Rev. A **18**(2), 324 (1978)
17. R. Barbieri, M. Caffo, E. Remiddi, Lettere al Nuovo Cimento **7**, 60 (1973)
18. H. Suura, E.H. Wichmann, Phys. Rev. **105**(6), 1930 (1957)
19. A. Petermann, Phys. Rev. **105**(6), 1931 (1957)
20. E. Borie, Helvetica Physica Acta **48**, 671 (1975)
21. J.L. Friar, J. Martorell, D.W.L. Sprung, Phys. Rev. A **59**(5), 4061 (1999)
22. A. Martynenko, R. Faustov, Physics of Atomic Nuclei **63**(5), 845 (2000)
23. A. Martynenko, R. Faustov, Physics of Atomic Nuclei **64**(7), 1282 (2001)
24. W.A. Barker, F.N. Glover, Phys. Rev. **99**(1), 317 (1955)
25. R. Rosenfelder, Physics Letters B **463**(2-4), 317 (1999)
26. J.L. Friar, Annals of Physics **122**(1), 151 (1979)
27. L.A. Borisoglebsky, E.E. Trofimenko, Physics Letters B **81**(2), 175 (1979)
28. J.L. Friar, Zeitschrift für Physik A Hadrons and Nuclei **292**(1), 1 (1979)
29. J.L. Friar, Zeitschrift für Physik A Hadrons and Nuclei **303**(1), 84 (1981)

| #  | Contribution                                                                               | Ref.      | Our selection |         | Pachucki <sup>1-3</sup> |        | Borie <sup>5</sup> |         |
|----|--------------------------------------------------------------------------------------------|-----------|---------------|---------|-------------------------|--------|--------------------|---------|
|    |                                                                                            |           | Value         | Unc.    | Value                   | Unc.   | Value              | Unc.    |
| 1  | NR One loop electron VP                                                                    | 1,2       |               |         | 205.0074                |        |                    |         |
| 2  | Relativistic correction (corrected)                                                        | 1-3,5     |               |         | 0.0169                  |        |                    |         |
| 3  | Relativistic one loop VP                                                                   | 5         | 205.0282      |         |                         |        | 205.0282           |         |
| 4  | NR two-loop electron VP                                                                    | 5,14      | 1.5081        |         | 1.5079                  |        | 1.5081             |         |
| 5  | Polarization insertion in two Coulomb lines                                                | 1,2,5     | 0.1509        |         | 0.1509                  |        | 0.1510             |         |
| 6  | NR three-loop electron VP                                                                  | 11        | 0.00529       |         |                         |        |                    |         |
| 7  | Polarisation insertion in two and three Coulomb lines (corrected)                          | 11,12     | 0.00223       |         |                         |        |                    |         |
| 8  | Three-loop VP (total, uncorrected)                                                         |           |               |         | 0.0076                  |        | 0.00761            |         |
| 9  | Wichmann-Kroll                                                                             | 5,15,16   | -0.00103      |         |                         |        | -0.00103           |         |
| 10 | Light by light electron loop contribution (Virtual Delbrück scattering)                    | 6         | 0.00135       | 0.00135 |                         |        | 0.00135            | 0.00015 |
| 11 | Radiative photon and electron polarization in the Coulomb line $\alpha^2(Z\alpha)^4$       | 1,2       | -0.00500      | 0.0010  | -0.006                  | 0.001  | -0.005             |         |
| 12 | Electron loop in the radiative photon of order $\alpha^2(Z\alpha)^4$                       | 17-19     | -0.00150      |         |                         |        |                    |         |
| 13 | Mixed electron and muon loops                                                              | 20        | 0.00007       |         |                         |        | 0.00007            |         |
| 14 | Hadronic polarization $\alpha(Z\alpha)^4 m_r$                                              | 21-23     | 0.01077       | 0.00038 | 0.0113                  | 0.0003 | 0.011              | 0.002   |
| 15 | Hadronic polarization $\alpha(Z\alpha)^5 m_r$                                              | 22,23     | 0.000047      |         |                         |        |                    |         |
| 16 | Hadronic polarization in the radiative photon $\alpha^2(Z\alpha)^4 m_r$                    | 22,23     | -0.000015     |         |                         |        |                    |         |
| 17 | Recoil contribution                                                                        | 24        | 0.05750       |         | 0.0575                  |        | 0.0575             |         |
| 18 | Recoil finite size                                                                         | 5         | 0.01300       | 0.001   |                         |        | 0.013              | 0.001   |
| 19 | Recoil correction to VP                                                                    | 5         | -0.00410      |         |                         |        | -0.0041            |         |
| 20 | Radiative corrections of order $\alpha^n(Z\alpha)^k m_r$                                   | 2,7       | -0.66770      |         | -0.6677                 |        | -0.66788           |         |
| 21 | Muon Lamb shift 4th order                                                                  | 5         | -0.00169      |         |                         |        | -0.00169           |         |
| 22 | Recoil corrections of order $\alpha(Z\alpha)^5 \frac{m}{M} m_r$                            | 2,5-7     | -0.04497      |         | -0.045                  |        | -0.04497           |         |
| 23 | Recoil of order $\alpha^6$                                                                 | 2         | 0.00030       |         | 0.0003                  |        |                    |         |
| 24 | Radiative recoil corrections of order $\alpha(Z\alpha)^n \frac{m}{M} m_r$                  | 1,2,7     | -0.00960      |         | -0.0099                 |        | -0.0096            |         |
| 25 | Nuclear structure correction of order $(Z\alpha)^5$ (Proton polarizability contribution)   | 2,5,22,25 | 0.015         | 0.004   | 0.012                   | 0.002  | 0.015              | 0.004   |
| 26 | Polarization operator induced correction to nuclear polarizability $\alpha(Z\alpha)^5 m_r$ | 23        | 0.00019       |         |                         |        |                    |         |
| 27 | Radiative photon induced correction to nuclear polarizability $\alpha(Z\alpha)^5 m_r$      | 23        | -0.00001      |         |                         |        |                    |         |
|    | Sum                                                                                        |           | 206.0573      | 0.0045  | 206.0432                | 0.0023 | 206.05856          | 0.0046  |

Table 1: All known radius-**independent** contributions to the Lamb shift in  $\mu p$  from different authors, and the one we selected. We follow the nomenclature of Eides *et al.*<sup>7</sup> Table 7.1. Item # 8 in Refs.<sup>2,5</sup> is the sum of items #6 and #7, without the recent correction from Ref.<sup>12</sup>. The error of #10 has been increased to 100% to account for a remark in Ref.<sup>7</sup>. Values are in meV and the uncertainties have been added in quadrature.

| Contribution                                                         | Ref.    | our selection |                         | Pachucki <sup>2</sup> | Borie <sup>5</sup> |
|----------------------------------------------------------------------|---------|---------------|-------------------------|-----------------------|--------------------|
| Leading nuclear size contribution                                    | 26      | -5.19745      | $\langle r_p^2 \rangle$ | -5.1974               | -5.1971            |
| Radiative corrections to nuclear finite size effect                  | 2,26    | -0.0275       | $\langle r_p^2 \rangle$ | -0.0282               | -0.0273            |
| Nuclear size correction of order $(Z\alpha)^6 \langle r_p^2 \rangle$ | 1,27-29 | -0.001243     | $\langle r_p^2 \rangle$ |                       |                    |
| Total $\langle r_p^2 \rangle$ contribution                           |         | -5.22619      | $\langle r_p^2 \rangle$ | -5.2256               | -5.2244            |
| Nuclear size correction of order $(Z\alpha)^5$                       | 1,2     | 0.0347        | $\langle r_p^3 \rangle$ | 0.0363                | 0.0347             |

Table 2: All relevant radius-**dependent** contributions as summarized in Eides *et al.*<sup>7</sup>, compared to Refs.<sup>2,5</sup>. Values are in meV and radii in fm.
